# Supplementary material for: Determination of oceanic ozone deposition by ship-borne eddy covariance flux measurements
Source: Copernicus journal article supplement (doi:10.5194/amt-3-441-2010), 2010-04-12
Supplement: Supplementary file 1 [file amt-3-441-2010-supplement.pdf]

# 1 Electronic Supplement Materials

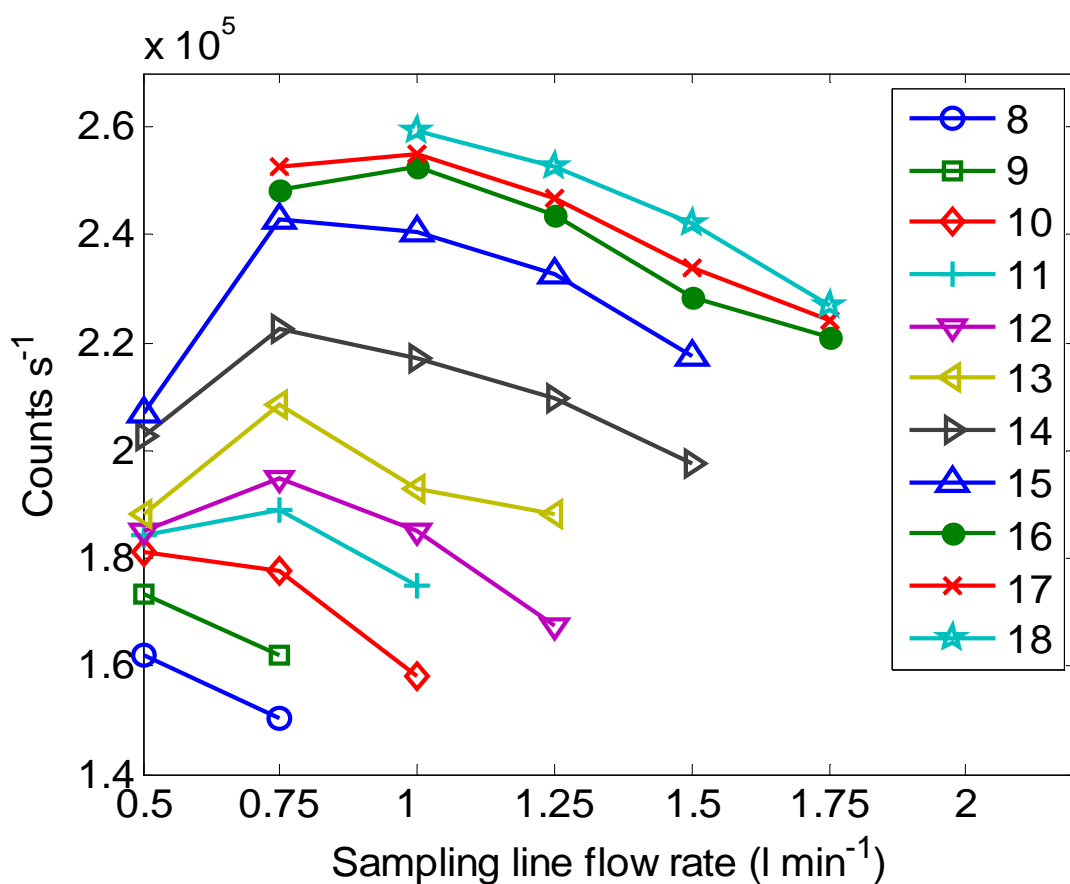

2

3

4

5 Figure S-1. Instrument response (in counts  $\text{s}^{-1}$ ) as a function of sample flow rate ( $\text{l min}^{-1}$ )

6 through the reaction chamber, and for different reaction chamber pressures (in Torr).

7

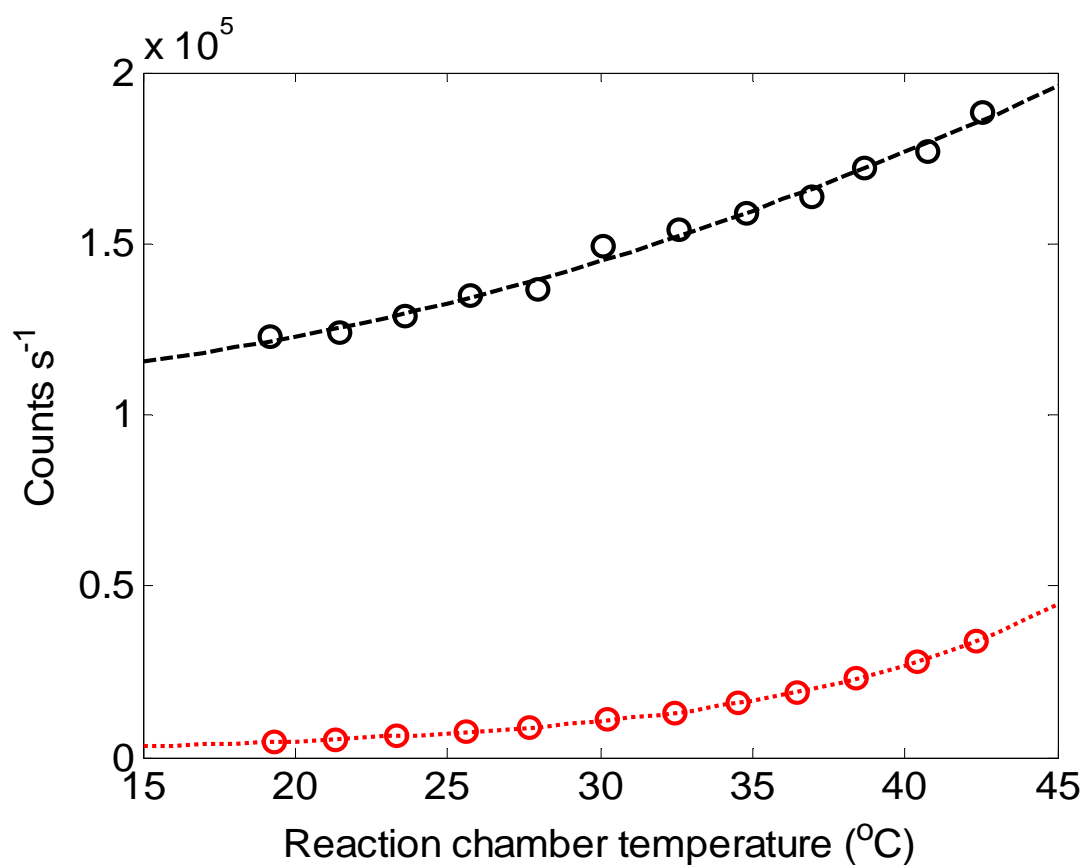

8

9

Figure S-2. Instrument response (in counts s<sup>-1</sup>) as a function of reaction chamber temperature (°C) for a constant O<sub>3</sub> concentration. Black circles show the total signal and the red circles show the background signal at zero ozone concentration. The increase in the background signal at higher temperatures is associated with the warming of the PMT from heat transfer from the reaction chamber, which leads to more thermo-ionic emission.

16

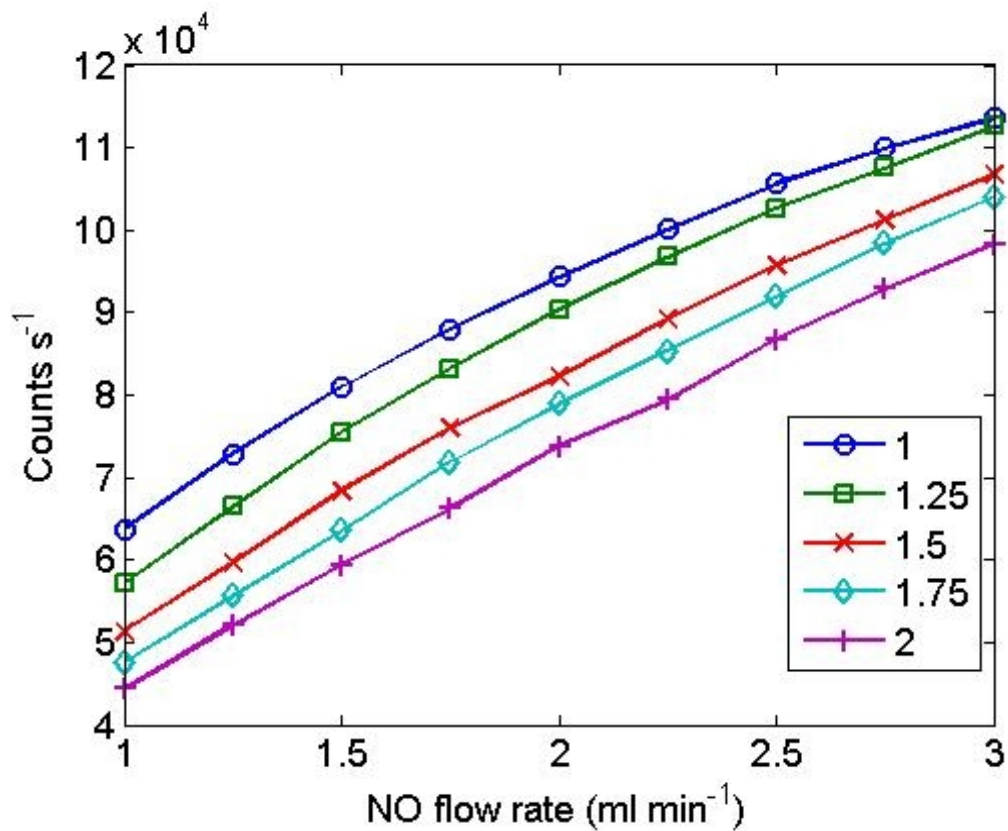

17

18

19 Figure S-3. Instrument response (in  $\text{counts s}^{-1}$ ) as a function of nitric oxide flow rate ( $\text{ml}$   
 20  $\text{min}^{-1}$ ), and for different sample flow rates into the reaction chamber ( $1 \text{ min}^{-1}$ ).

21

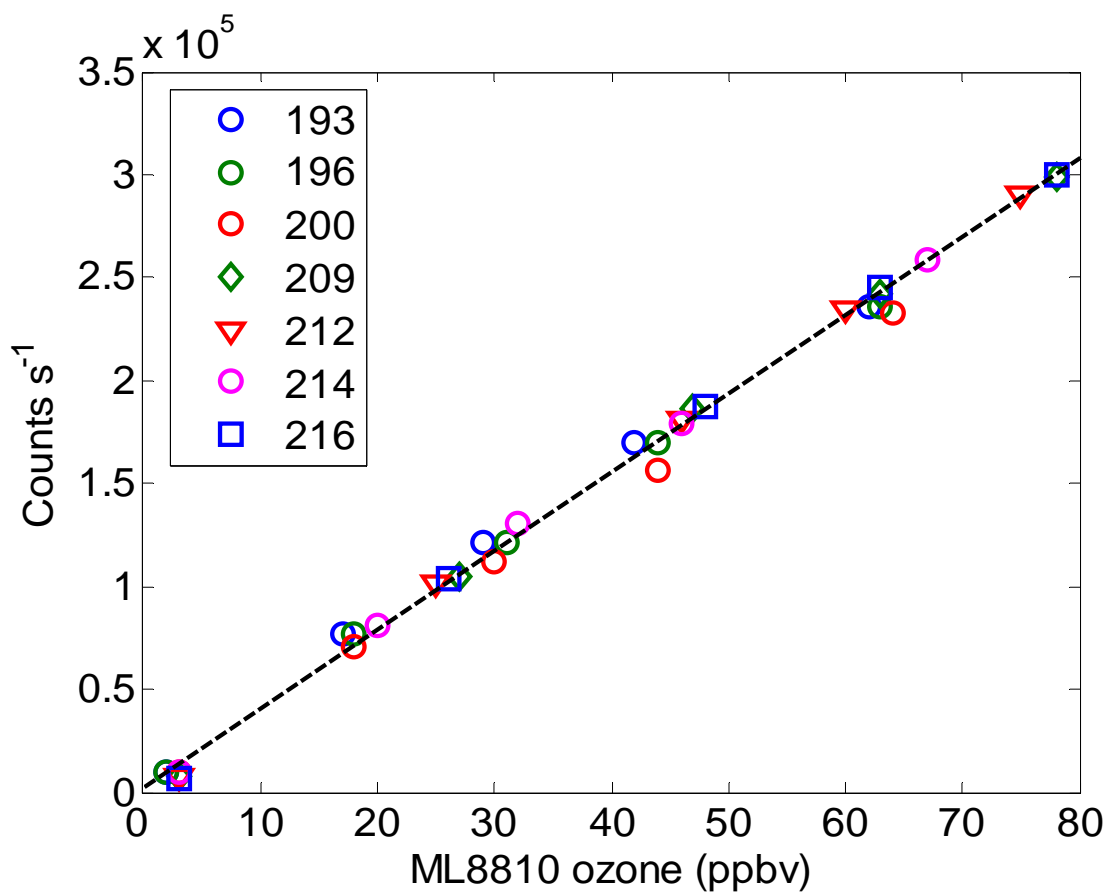

Figure S-4. Calibration of the fast response ozone chemiluminescence instrument (FRCI) with the Monitor Lab (ML) 8810 during the GOMECC-2007 cruise (Day of Year calibrations as indicated in the figure legend).

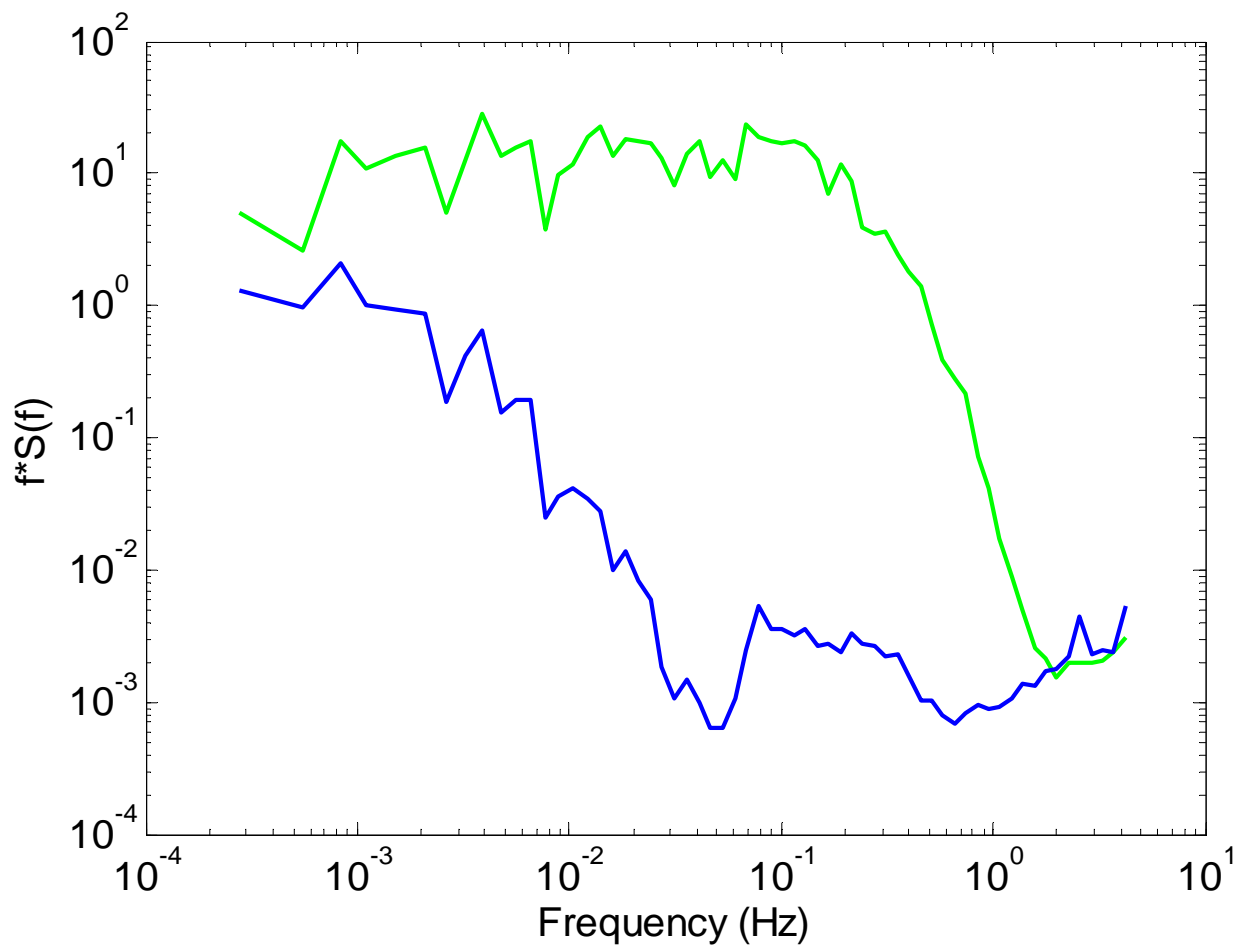

27

28

29 Figure S-5. Power spectrum of the water vapour flux measured with the LI-COR  
 30 upstream of the Nafion Dryer (green data points) in comparison to the measurements  
 31 from the LI-COR downstream of the Nafion Dryer (blue data).

### Signal to Noise Ratio Considerations

In this section we consider the two principal sources of noise which contribute to the S/N ratio. One source is the dark current noise from the PMT detector, and the second one is the shot noise or statistical noise. The total number of counts measured by the FRCI can be expressed as:

$$N_t = (\xi \times X \times \Delta t) + (N_{DC} \times \Delta t) \quad (\text{Eq. S-1})$$

where  $N_t$  is the total number of counts measured in  $\Delta t$ ,  $\xi$  is the sensitivity of the instrument (in counts  $\text{s}^{-1}$  ppbv<sup>-1</sup> of ozone),  $\Delta t$  is the measurement time (in sec),  $X$  is the ozone mixing ratio (in ppbv) and  $N_{DC}$  is the number of counts per sec resulting from the dark current.

From the point of view of counting statistics, the S/N ratio can be estimated by the number of counts divided by the square root of the number of counts. Unwanted background counts (dark current) must be subtracted from the measured background plus signal count. Thus, the S/N ratio can be expressed as:

$$\frac{S}{N} = \frac{\xi \times \Delta t \times X}{\sqrt{\xi \times X \times \Delta t + N_{DC} \times \Delta t}} = \sqrt{\frac{\xi \times \Delta t \times X}{1 + \frac{N_{DC}}{\xi \times X}}} \quad (\text{Eq. S-2})$$

If the background rate  $N_{dc}$  is small or inexistent with respect to the signal count rate ( $\xi \times X$ ), the S/N ratio reduces to  $\sqrt{\xi \times X \times \Delta t}$ , the square root of the total signal counts.

From this equation, it follows that at lower ozone levels, the dark current will have a bigger effect on the S/N ratio than at higher ozone concentration. For instance, with a dark current value of  $3500 \text{ cts s}^{-1}$  and an ozone concentration of 2 ppbv, the dark current will have a ~30% effect on the S/N ratio. On the other hand, it will only be a 3% effect for a 20 ppbv ozone level.

Other additive sources of noise will contribute to a reduction in the S/N ratio, for example noise from the various electronic circuits used in the instrument. Figure S-6 shows results from two sets of experiments investigating the experimental S/N ratio in comparison to the theoretical value. The theoretical S/N was calculated according to Eq. S-2. The experimental S was taken as the mean of counts over a 1-min measurement period, and S was derived as the standard deviation of the 10 Hz data over that same period. The blue data resulted from a calibration experiment, where ozone standards from an ozone generator source were sampled with the instrument. For this experiment, the theoretical S/N at all sampled ozone mixing ratios is  $1.17 \pm 0.01$  larger than the experimentally determined one, indicating a ~15% deterioration of the theoretical S/N from other (than counting statistics and dark current) contributing sources of measurement noise. The other data shown in the figure resulted from an experiment where the FRCI (in this case operated with a 2% NO mixture (in  $N_2$ ), yielding a sensitivity of  $\sim 2200 \text{ counts s}^{-1} \text{ ppbv}^{-1}$ ) was used for ozone flux measurements over snow. Here, the ratio of the theoretical S/N ratio over the experimentally determined value is  $1.28 \pm 0.28$ . Under these conditions the

calculated 'noise' in the ambient ozone measurement results from instrument noise as well as from fluctuations in the ozone mixing ratio, i.e. contributions from the ozone flux ( $w'O_3'$ ). Therefore the difference between the experimentally determined and the theoretical S/N ratio is, as expected, larger, than during the sampling of the ozone standard, with the variability of  $[O_3]$  from the flux (i.e.  $O_3'$ ) contributing  $\sim 1/3$  of the decrease of the S/N in comparison to the theoretical value.

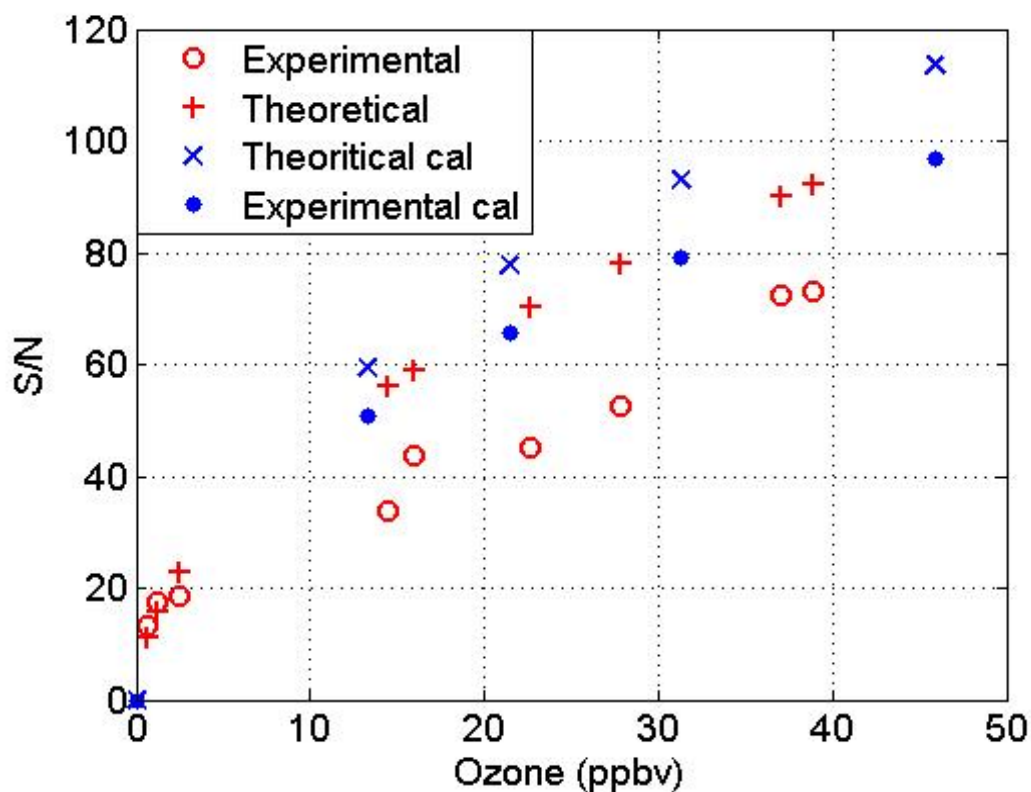

Figure S-6

S/N ratio obtained with the FRCI. Two different sets of experiments are displayed. The blue data resulted from a calibration experiment, where ozone standards from an ozone generator were sampled. The red data were obtained during ambient flux measurements



92 (in this case over snow-covered, frozen ground in Barrow, Alaska) where the instrument  
93 was operated with a 2% NO mixture (in N<sub>2</sub>) and with a sensitivity of ~2200 counts s<sup>-1</sup>  
94 ppbv<sup>-1</sup> (blue circles). Data reflect results from 1-min intervals at different ambient ozone  
95 levels. Theoretical values result from the counting statistic expression (Eq. S-2).
